# Supplementary material for: A novel counterbalanced implementation study design: methodological description and application to implementation research
Source: Implement Sci. 2019 May 2;14:45. doi: 10.1186/s13012-019-0896-0 (PMC6498461; doi:10.1186/s13012-019-0896-0)
Supplement: Supplementary file 3 — Interaction effects analysis model. (DOCX 79 kb) [file 13012_2019_896_MOESM3_ESM.docx]

| Yuic = α + (β1 x1ui + … + βn xnui ) + (γ1 z1uc + … + γn zmuc ) + δ(x1ui * z1uc) + … + δ(xnui * z1uc) + … + δ(x1ui * zmuc) +… + δ(xnui * zmuc) + buic + au…  Y = outcome for a unit of randomisation given a strategy/context combination  u = unit of randomisation (cluster)  i = implementation strategy (intervention)  c = health context  α = overall intercept  β = fixed slope for implementation strategy  x = indicator variable of which implementation strategy is active  n = number of implementation strategy levels  γ = fixed slope for health context  z = indicator variable of which health context is active  m = number of health contexts  δ = Interaction effect coefficient  buic = residual  au = unit of randomisation specific deviation from the overall intercept | |
| --- | --- |

Where δic denotes the interaction effect terms included in the generalised linear mixed model regression analysis.
